1 **Natural infection and vertical transmission of two flaviviruses (Yellow fever and**  
2 **Zika) in mosquitoes in primary forests in the Brazilian state of Rio de Janeiro**  
3 **(Diptera: Culicidae)**

4

5 Short running title: Natural infection and vertical transmission of two flaviviruses

6

7 **Jeronimo Alencar<sup>1\*</sup>, Cecilia Ferreira de Mello<sup>1,2</sup>, Carlos Brisola Marcondes<sup>3</sup>,**  
8 **Anthony Érico Guimarães<sup>1</sup>, Helena Keiko Toma<sup>4</sup>, Amanda Queiroz Bastos<sup>1,2</sup>,**  
9 **Shayenne Olsson Freitas Silva<sup>1,5</sup>, Sergio Lisboa Machado<sup>4\*</sup>**

10

11 <sup>1</sup>Diptera Laboratory, Oswaldo Cruz Institute (FIOCRUZ), Av. Brazil 4365, ZIP: 21040-  
12 360 Manguinhos, Rio de Janeiro, Brazil

13 <sup>2</sup>Postgraduate Program in Animal Biology, Institute of Biology, Federal Rural  
14 University of Rio de Janeiro, ZIP: 23890-000 Seropédica, Rio de Janeiro, Brazil

15 <sup>3</sup>Department of Microbiology Immunology and Parasitology, Center of Biological  
16 Sciences, Federal University of Santa Catarina, 88040-900, Florianópolis, Santa  
17 Catarina, Brazil

18 <sup>4</sup>Laboratory of Molecular Diagnostics and Hematology, Federal University of Rio de  
19 Janeiro, Federal University of Rio de Janeiro (UFRJ)

20 <sup>5</sup>Postgraduate Program in Tropical Medicine, Oswaldo Cruz Institute (Fiocruz), Rio de  
21 Janeiro, Brazil

22

23 \*Corresponding authors

24 E-mail: [jafalencar@gmail.com](mailto:jafalencar@gmail.com) (JA)

25 E-mail: [machadosl@globo.com](mailto:machadosl@globo.com) (SLM)

26 **Abstract**

27 **Background:** Zika virus (ZIKV) was recently introduced in the American continent,  
28 probably transmitted by *Aedes aegypti* and possibly by *Ae. albopictus* and *Culex*  
29 *quinquefasciatus* in urban environments. ZIKV represents a known public health  
30 problem as it has been involved in newborn cases of congenital microcephaly in South  
31 America since 2005. The transmission of this virus in forested areas of other countries  
32 and its relative ubiquity in relation to its vectors and reservoirs raises suspicions of its  
33 adaptation to non-human modified environments (*i.e.*, natural forests reserve) or on this  
34 continent, similar to those seen for Yellow fever virus (YFV). The objective of this  
35 work was to have an epidemiological monitoring tool mapping insects as well as  
36 circulating arboviruses in wild areas with low human interference. This study was based  
37 on the history of the insect flavivirus spreading cycle. **Methods/Principal Findings:**  
38 Using a previously described sensitive PCR-based assay to assess the conserved NS5  
39 region of the *Flavivirus* genus, both YFV partial genome and ZIKV were found in pools  
40 of *Aedes albopictus*, a sylvatic mosquito adapted to human-modified environments, and  
41 in *Haemagogus leucocelaenus*, a sylvatic mosquito. **Conclusions:** This is the first report  
42 of natural infection by ZIKV in mosquitoes in a sylvatic environment on the American  
43 continent. The wide distribution of these mosquitoes is probably important in the  
44 transmission of ZIKV. Vertical transmission indicates a higher efficiency for the  
45 maintenance and transmission of the virus in nature as well as the presence of the ZIKV  
46 in permanent character in the forest areas as it occurs with the YFV thus making more  
47 difficult the prevention of new cases of Zika in humans.

48

49

50

51 **Author Summary**

52 Arboviruses are diseases transmitted by arthropod vectors, hence the origin of the term  
53 ARthropod BORne VIRUS, which is adopted since 1942. This work had as objective to  
54 survey the circulating insects as well as to detect the presence of viruses in them.  
55 Arboviruses circulate between insects and vertebrate hosts, having importance for  
56 promoting diseases in humans and animals. The diseases most known at the time, due to  
57 the recent cases reported by South America, are Dengue, Zika, Yellow Fever and  
58 Chikungunya. For this study, we used appropriate traps to collect the insects and their  
59 eggs in wild areas where there is little human interference. After collection, mosquitoes  
60 and / or eggs were identified and separated as to the source and species. The eggs were  
61 kept in laboratory conditions for the hatching of new insects. All the insects obtained  
62 were separated into pools to be macerated and thus extract the RNA from the viruses to  
63 be studied. Using molecular biology techniques, in our case the RT-PCR (Reverse  
64 Transcriptase Polymerase Chain Reaction), we amplified the RNA and in sequentially,  
65 we performed the sequencing reaction. With sequencing, it is possible to identify which  
66 virus material is present since each virus has a characteristic arrangement. For the  
67 identification of the sequences, we need to use some computational programs that  
68 guarantee us the correct result.

69

70 **Key words:** Culicidae; *Haemagogus leucocelaenus*, *Aedes albopictus*, Zika virus;  
71 natural infection; Yellow fever

72

73

74

75

## 76 **Introduction**

77       The Flaviviridae family has four genera and the *Flavivirus* genus contains over 90  
78 viruses, some of which are of clinical importance for humans and animals, such as the  
79 Yellow fever virus (YFV), Dengue virus (DENV), Zika virus (ZIKV), and West Nile  
80 virus (WNV). Flaviviruses are enveloped, icosahedral viruses and have an RNA  
81 genome composed of a single positive-strand chain of approximately 11000 nucleotides.  
82 Their genomes encode three structural proteins (capsid [C], envelope [E], and pre-  
83 Membrane/membrane [prM/M]) and seven non-structural proteins (NS1, NS2a, NS2b,  
84 NS3, NS4a, NS4b, and NS5) that have functions involved in replication, virulence, and  
85 pathogenicity [1].

86       ZIKV, first identified in a forest in Uganda, has recently spread to Asia, Pacific  
87 islands, and the American continent, causing serious concern for microcephaly in  
88 fetuses [2–4]. Mostly transmitted in urban environments by *Aedes aegypti* and possibly  
89 *Aedes albopictus*, it has been found in many species of mosquitoes, mostly in *Aedes*  
90 species (31 spp.), but also in some *Anopheles*, *Culex* and other genera, and even in a  
91 species of horse fly [2,5]. The first autochthonous case of ZIKV in Brazil was diagnosed  
92 in May 2015[6], and its circulation was confirmed in all 26 states and federal district  
93 [7].

94       Molecular techniques, as well as immunological methods, have been used to  
95 diagnose ZIKV in a variety of species of mammals belonging to nine orders  
96 (Artiodactyla, Carnivora, Cetartiodactyla, Chiroptera, Lagomorpha, Perissodactyla,  
97 Primates, Proboscidea and Rodentia), three orders of birds (Anseriformes,  
98 Charadriiformes, and Ciconiiformes) and lizards Squamata [8], mostly in Africa. On the  
99 American continent, possibly due to its recent introduction and smaller number of  
100 studies, it has only been found in monkeys in Ceará state [9]. Some primates and

101 Edentata have been found to be serologically positive for *Flavivirus* in the South of  
102 Bahia state [10].

103 Even though non-human primates (NHPs) are considered of low importance, their  
104 circulation in low degradation forest environments, especially the diversified fauna of  
105 mosquitoes and mammals found in Brazil, needs to be assessed [8, 11].

106 In this study, we report the natural infection and vertical transmission of ZIKV  
107 and YFV in *Haemagogus leucocelaenus* and *Ae. albopictus* in a forest in Casimiro de  
108 Abreu and Nova Iguaçu, in the Brazilian state of Rio de Janeiro.

109 There is currently an ongoing outbreak of sylvatic yellow fever in Brazil. The  
110 outbreak probably started at the end of 2016, when the first case was reported in the  
111 state of Minas Gerais, but has since spread to the states of Espírito Santo, São Paulo,  
112 and Rio de Janeiro. According to a WHO report, as of April 2017, YFV transmission  
113 (epizootic and human cases) continues to expand towards the Atlantic coast of Brazil in  
114 areas not previously deemed to be at risk for yellow fever transmission [12].

115 The main genera of mosquitoes capable of being infected and transmitting the  
116 sylvatic YFV are *Haemagogus* and *Sabethes* which are considered to be biological  
117 vectors and to be responsible for maintenance of the natural cycle of this zoonosis in  
118 forested areas of the Americas. In the southeast of Brazil, during the present epidemic,  
119 *Hg. leucocelaenus* and *Hg. janthinomys* are considered important vectors [13].

120 *Haemagogus* are essentially sylvatic mosquitoes, with diurnal acrodendrophilic  
121 habitats, and are mainly found in densely forested areas [14]. *Haemagogus*  
122 *leucocelaenus* is the species most frequently found in Brazil and is considered a primary  
123 vector for SYF in southeastern Brazil. It is widely distributed from Trinidad to the south  
124 of Brazil, This Culicidae is commonly found in Brazil and is considered to be of  
125 epidemiological importance due to its involvement in the transmission of arboviruses,

126 with Yellow fever being one of the most important. A group of researches [15] reported  
127 through the use of hemi-nested reverse transcriptase PCR identifying sequences  
128 compatible with DENV-1 in *Hg. leucocelaenus* from Coribe, a city from northeast  
129 Bahia, suggesting the occurrence of a sylvatic cycle and highlighting the importance of  
130 studies regarding these wild mosquitoes [16,17].

131

## 132 **Materials and methods**

### 133 **Ethics statement**

134 All research was performed in accordance with scientific license number 44333  
135 provided by (Ministry of Environment - MMA, Chico Mendes Institute of Biodiversity  
136 Conservation - ICMBio, Biodiversity Information and Authorization System – SISBIO).  
137 Forests collections were undertaken with informed consent and cooperation of the  
138 property owners, householders or local authorities. All members of the collection team  
139 were adequately vaccinated against YFV and were aware of the potential risks in the  
140 area under study.

141

### 142 **Study areas**

143 The eggs of *Hg. leucocelaenus* and *Ae. albopictus* were collected using ovitraps,  
144 from September 2018 to March 2019. The present study was carried out in Três Montes  
145 Farm (TMF), Três Morros Private Reserve of Natural Heritage - TMPRNH, Casimiro  
146 de Abreu city), and Sítio Boa Esperança (Tinguá, Nova Iguaçu city). Casimiro de Abreu  
147 located in southeastern Brazil, approximately 140 km from the city of Rio de Janeiro  
148 and Tinguá at approximately 30 km from Rio de Janeiro. Samples were collected from  
149 four sampling sites. Geographical coordinates of the sampling sites were obtained using  
150 a Garmin GPSMAP 60CS (Garmin International, Inc., Olathe, KA, USA) (Table 1).

151 **Table 1. Detection of Yellow fever virus (YFV), Zika virus (ZIKV) in *Aedes***  
 152 ***albopictus* and *Haemagogus leucocelaenus* in primary forests in the Brazilian state**  
 153 **of Rio de Janeiro, Brazil.**

| Pool | Mosquito Species         | Sex | Total specimens | Month/Year collected | Geographic coordinates           | Trap identification | PAN Flavivirus PCR Result | Sequencing result |
|------|--------------------------|-----|-----------------|----------------------|----------------------------------|---------------------|---------------------------|-------------------|
| 43   | <i>Ae. albopictus</i>    | ♀   | 32              | jan/19               | 22°33'01.3" S<br>42°00'52.7" W   | TMPRNH - 32*        | Positive                  | Zika Virus        |
| 45   | <i>Ae. albopictus</i>    | ♂   | 2               | Oct/2018             | 22°31'40.1" S<br>42°02'58.6" W   | TMF -2 *            | Positive                  | Zika Virus        |
| 54   | <i>Hg. leucocelaenus</i> | ♀   | 6               | jan/19               | 22°35'11.98" S<br>43°24'34.12" W | Tinguá*             | Positive                  | Zika Virus        |
| 62   | <i>Ae. albopictus</i>    | ♀   | 9               | Oct/2018             | 22°31'43.9" S<br>42°02'56.8" W   | TMF -3 *            | Positive                  | Yellow Fever      |
| 64   | <i>Hg. leucocelaenus</i> | ♂   | 3               | Sep/2018             | 22°31'49.5" S<br>42°02'56.3" W   | TMF -7 *            | Positive                  | Yellow Fever      |
|      |                          |     | 5               | Oct/2018             |                                  |                     | Positive                  | Yellow Fever      |

154

155 \* (Três Montes Farm – TMF, sites 2, 3, and 7), \* (Três Morros Private Reserve of Natural  
 156 Heritage– TMPRNH, site 32), and \* (Sítio Boa Esperança, Tinguá, Nova Iguaçu).

157

158 Location of the study area and sampling sites in Rio de Janeiro. Geographical  
 159 coordinates of the sampling sites were obtained using the Garmin GPSmap 60 CS GPS.  
 160 Maps were prepared in ArcGIS PRO data in the public domain (URL:  
 161 <https://pro.arcgis.com/en/pro-app/>. Accessed: May 2019) and edited in CorelDRAW  
 162 Graphics Suite X7 (Fig 1).

163 The main land cover of the region is typical Atlantic forest vegetation, with dense  
 164 ombrophilous sub-mountain forests in moderate and advanced stages of regeneration.  
 165 The region, located in the hydrographic basin of São João River, is situated in the  
 166 intertropical zone (at low latitudes) and is highly influenced by the Atlantic Ocean.  
 167 Thus, its climate is predominantly a humid tropical type [18]. The average temperature

168 is 26.8°C, with a relative humidity of 56% and 1,200 mm precipitation [19]. Higher  
169 rainfall levels occur from October to March.

170 At each sampling site, samples were collected using ovitraps. The ovitraps  
171 consisted of cylindrical 1L black plastic containers, containing four wooden paddles  
172 (2.5 × 14 cm). The traps were placed at a height that varied between 2 and 10 m above  
173 soil level. Details on the use and manufacturing of the ovitraps can be found in studies  
174 previously done [20,21]. The paddles in the traps were examined every two weeks to  
175 detect and quantify the eggs.

176 Just after arriving in the laboratory positive-paddles were immersed in white trays  
177 filled with dechlorinated water at  $29 \pm 1^\circ\text{C}$  and these trays were kept in an acclimatized  
178 chamber for hatching. After 3 days, the paddles were removed from the water and left to  
179 air dry for another 3 days to quantify the hatched larvae. Immature forms were reared as  
180 previously described [22], and processed for diagnosis of natural infection by  
181 arboviruses through molecular techniques.

182 Before extraction, all mosquitoes were retained in cryotubes in a  $-80^\circ\text{C}$   
183 ultrafreezer, separated by species and trap identification. The specimens were kept alive  
184 for specific determination in adulthood, by direct observation of the morphological  
185 characters evidenced by the stereomicroscopic microscope (Zeiss®) and consultation  
186 with the respective descriptions/ diagnoses of the spp, using dichotomous keys [14, 23].  
187 Mosquito genera were abbreviated according to a well-established abbreviation [24].

188

### 189 **RNA extraction**

190 We made pools of 3 to 33 mosquitoes, mixing males and females to be further  
191 macerated. Viral RNA was extracted from the mosquito pools using MN Nucleo Spin®  
192 RNA (Macherey-Nagel GmbH & Co. KG, ref. 740955.250) and cDNA was



193 immediately synthesized using Hi-capacity RNA-to-DNA™ kit (Applied Biosystems™,  
194 ref. 4388950) both according to manufacturers instructions. DNA was then quantified  
195 using Denovix DS-11+b Quantifier (DeNovix Inc., USA) and maintained at -20°C until  
196 molecular investigation of the flaviviruses.

197

### 198 **PCR for *Flaviviruses***

199 We used primer sequences derived from the conserved NS5 region of the  
200 *Flavivirus* genus that had previously been described [25], and then adapted the  
201 conditions for PCR amplification.

202 The conditions used were 1 x PCR buffer, 1.5 mM MgCl<sub>2</sub>, 10 pmol Pan-Flavi  
203 Forward primer (5'-TAC AAC ATG ATG GGG AAR AGA GAR AA-3') and 10 pmol  
204 Pan-Flavi Reverse primer (5'-GCW GAT GAC ACM GCN GGC TGG GAC AC-3'),  
205 1.0 U of DNA polymerase (Thermo Fisher Scientific, 168 Third Avenue, Waltham, MA  
206 02451, United States), and a final extension of 72°C for 5 min.

207 PCR products were evaluated by electrophoresis on 1.5% agarose gels in 1 ×  
208 TBE (Trizma, boric acid, EDTA) buffer and visualized under UV light (260 nm) after  
209 ethidium bromide staining. The expected amplified fragment ranged from 200-300 bp  
210 and were purified using Cellco PCR purification kit (Cellco Biotec do Brasil Ltda.  
211 Cat.#DPK-106L).

212

### 213 **Nucleotide sequencing**

214 Sequencing was kindly performed by the Oswaldo Cruz Foundation (FIOCRUZ)  
215 at the RPT01A sequencing laboratory as previously described [26]. Approximately 10–  
216 40 ng of purified PCR product was sequenced following the BigDye Terminator v.3.1  
217 Cycle Sequencing protocol using an ABI 3730 DNA Sequencer. The sequences were

218 then analyzed using Geneious R10 (Biomatters, v.10.2.6). The contigs were compared  
219 with reference sequences using the nucleotide Basic Local Alignment Search Tool  
220 (BLASTn, GenBank, PubMed).

221 **Accessions** – Nucleotide sequences from the NS5 segments obtained in the present  
222 study were deposited in GenBank.

223

## 224 **Results**

225 Since September 2018, 924 insects were collected and stored in a -80°C  
226 ultrafreezer until processing. Insects were separated based on the ovitrap location and  
227 species. The number of mosquitos in each pool processed was based on previous  
228 literature reports [27–30] as well as the efficiency of RNA extraction kit; as a result, we  
229 used mosquito pools raging from 3 to 33 insects. The processing of mosquito pools  
230 requires a sensitive molecular method, since the minimum infection rate in females  
231 mosquitoes ranges from 0.1 to 3.9 per 1000 [31]. Up until now, we have processed 70  
232 pools from Três Montes Farm (TMF), Três Morros Private Reserve of Natural Heritage  
233 - TMPRNH, and Sítio Boa Esperança.

234 We were able to identify five positive mosquito pools from different species by  
235 carrying out the PCR using the NS5 region primers previously described [25]. When the  
236 PCR products were sequenced and analyzed by NCBI Blast (Basic Local Alignment  
237 Search Tool, at <https://blast.ncbi.nlm.nih.gov/Blast.cgi>), three pools positive for YFV  
238 and two pools positive for ZIKV were found. Although our PCR product sequences  
239 varied from between 200 and 241 bp, we found the sequenced pools had scores higher  
240 than 200 and identity indexes of between 90 to 96.4% of identity covering 94 to 98% of  
241 the sequences (Table 1), Gene Bank accession numbers: MK972825, MK972826,  
242 MK972827, MK972828 and MK972829.

## 243 Discussion

244 The NS5 region of the Flaviviridae family was used in this study because it is a  
245 commonly conserved region and has previously been used to identify viruses using  
246 sequencing methods [25,32-36]. Through this sequencing approach, we identified  
247 ZIKV and YFV in different sylvatic mosquito species. Sylvatic Yellow fever is usually  
248 found in *Ae. albopictus*, *Haemagogus leucocelaenus*, and *Hg. janthinomys* species [37-  
249 38]. It is also important to understand that the complete sylvatic cycle can be maintained  
250 in forests in the presence of vertebrate reservoirs [39]. A recent publication showed that  
251 *Aedes* mosquitoes can also be contaminated with ZIKV by breeding in contaminated  
252 aquatic environments [40].

253 Here, for the first time, ZIKV has been found in a forest environment on the  
254 American continent in both the sylvatic mosquito *Hg. leucocelaenus* and *Aedes*  
255 *albopictus*, a mosquito adapted to sylvatic and urban environments. It has been  
256 previously reported that *Aedes albopictus* is a natural ZIKV vector in several countries  
257 [41-44].

258 The finding of *Hg. leucocelaenus*, a sylvatic species, infected with ZIKV indicates  
259 the circulation of virus in this area, presumably along with some vertebrate reservoir(s).  
260 *Aedes albopictus* presents a transmission potential for ZIKV [45] and the simultaneous  
261 finding of this mosquito in the area means a risk for spillover from the forest to human-  
262 modified environments [46].

263 The blood feeding sources of *Hg. leucocelaenus* are diverse, feeding mostly on  
264 birds, but also on several mammals in Rio de Janeiro and Goiás state [22]. *Aedes*  
265 *albopictus* feeds mostly on mammals, preferring human blood when available [47, 48],  
266 but is also ubiquitous in its absence [49, 50].

267 Another risk factor is that *Ae. albopictus* can be the vector, of at least, for two  
268 different Flaviviruses since it was found in insect pools from Africa. In addition,

269 through laboratory tests of co-infection and super-infection, the possibility of dual  
270 infection transmission to humans has been shown [51].

271 The present results indicate a sylvatic cycle for Zika virus; hence, it is important  
272 to investigate its presence in other vectors, especially near urban areas. Since *Ae.*  
273 *albopictus* can easily go from forest environments to peridomestic areas and vice versa  
274 in Rio de Janeiro [52], there is a high likelihood of viral transport between these areas.

275 Localities in Ceará and Bahia, where ZIKV has been found in mammals, should  
276 have their mosquito fauna carefully studied. It should be emphasized that the presence  
277 of *Hg. janthinomys*, the other highly suspected species [13] in an urban forest (Parque  
278 Dois Irmãos) in Recife, Pernambuco state [53], a city highly endemic to ZIKV and  
279 other viruses (DENV and CHIKV) [54] should be studied for natural infection.

280 The finding of infection in mosquitoes reared from eggs obtained under natural  
281 conditions indicates the occurrence of transovarial transmission of ZIKV, and the  
282 presence of virus in the salivary glands of these mosquitoes should be investigated.  
283 Vertical transmission has been found in many arboviruses [55], and its role in  
284 maintenance of these viruses in nature should be evaluated. A low magnitude and long  
285 duration viremia (the ‘tortoise’ strategy), has been shown to result in higher rate of  
286 persistence in vectors and host populations compared to high magnitude, short duration  
287 viremia (the ‘hare’ strategy) [56].

288 The vectorial competence of these species and others present in the area needs to be  
289 carefully evaluated, to elucidate the real role in the transmission of ZIKV in low  
290 degradation environments with low human presence, like forest reserves and the  
291 possibility of transference between these and modified areas. The competence of many  
292 species, mostly in *Aedes* and *Culex*, has already been tested, but not *Haemagogus* [57].

293 A previous study utilizing CDC traps in a reserve at Casimiro de Abreu indicated  
294 the presence of at least 15 species, not including *Hg. leucocelaenus* and *Ae. albopictus*  
295 [58], probably due to their predominantly diurnal activity. Among the known vectors of  
296 sylvatic yellow fever, the species found in Casimiro de Abreu were *Hg. leucocelaenus*  
297 and *Hg. janthinomys*, being that this first taxon was found to be naturally infected by  
298 YFV in the same place and time as the outbreak of the disease. The results confirm the  
299 role of *Hg. leucocelaenus* as an important YFV vector in Southeastern Brazil.

300 Alencar et al (2016) [21] have reported three epidemiologically important  
301 mosquito species in the transmission of arboviruses (*Hg. leucocelaenus*, *Hg.*  
302 *janthinomys*, and *Ae. albopictus*) in this present study region. Considering that each  
303 viremic monkey can infect hundreds of mosquitoes, it is crucial to understand the  
304 dynamics of transmission. It is possible that a large number of *Hg. leucocelaenus* are  
305 infected and through vertical transmission, could play a role in the maintenance of  
306 epizootic and human infection, which contributes to the spread of the virus to other  
307 areas [59].

308 In general, YFV transmission occurs within forests, mainly affecting humans  
309 involved in activities such as logging, fishing, hunting and so on, but in the case of *Hg.*  
310 *leucocelaenus*, which tends to leave the forest, it can infect humans of both sexes and  
311 various ages. *Haemagogus leucocelaenus* infected with YFV were captured at ground  
312 level, where most of our specimens were obtained, during the outbreak that occurred in  
313 Rio Grande do Sul (Brazil) between 2008 and 2009 [60], which reinforces our  
314 hypothesis.

315 The occurrence of yellow fever virus in natural conditions demonstrates its  
316 current circulation in the Atlantic forest areas of the municipality of Casimiro de Abreu,  
317 Rio de Janeiro state. This is the first report of the detection of yellow fever virus in *Hg.*

318 *leucocelaenus* in Rio de Janeiro state since the last report 88 years ago in urban YF in  
319 this state [61].

320 Evidence of active sylvatic SYFV transmission in the nature reserves studied  
321 here and the abundance of the main mosquito vector for this disease in Brazil,  
322 necessitates active surveillance for the emergence of this virus in neighboring  
323 communities. Forests near human-modified areas positive for arbovirus, such as urban  
324 forests (e.g., Tijuca - Rio de Janeiro; Buraquinho – João Pessoa; Dois Irmãos – Recife)  
325 are a priority.

326 Mosquitoes adapted to urban environments, mostly *Ae. aegypti*, transmit YFV and  
327 ZIKV among humans. Since both are well-adapted to mosquitoes of several species, the  
328 spillover to preserved forests, circulating among wild vertebrate reservoirs and  
329 mosquitoes should not be surprising. However, if not studied, such sylvatic cycles will  
330 probably be uncovered Low levels of reactivity of primates infected with ZIKY or YFV  
331 near urban areas [11] must not discourage additional studies in such areas.

332 These results corroborate the warning of [56] of adaptation of ZIKV to forest  
333 environments, making impossible the eradication of virus from the continent and  
334 reinforcing the need for the control of urban mosquitoes and the development of a good  
335 vaccine.

336

### 337 **Acknowledgements**

338

339 The authors thank Farms Reunidas Agropecuarias Três Montes; Farm Três  
340 Morros, for providing the facilities to conduct the present study.

341

### 342 **Disclosure Statement:**

343 The authors declare that they have no competing interests.

344

## 345 **Funding**

346 This work was supported by the Research Support Foundation of the State of  
347 Rio de Janeiro (FAPERJ; grant numbers E-26/202.658/2018) and the Coordination for  
348 the Improvement of Higher Education Personnel (CAPES; grant number 1719247;  
349 1741497) and Conselho Nacional de Desenvolvimento Científico e Tecnológico-CNPq  
350 (301707/2017-0).

351

## 352 **References**

353

- 354 1. Chambers TJ, Chang SH, Galler R, Rice CM. Flavivirus genome  
355 organization, expression, and replication. *Annu Rev Microbiol.* 1990;44:  
356 649-688. doi: <https://doi.org/10.1146/annurev.mi.44.100190.003245> PMID:  
357 2174669
- 358 2. Yaren O, Alto BW, Gangodkar P V, Ranade SR, Patil KN, Bradley KM, et  
359 al. Point of sampling detection of Zika virus within a multiplexed kit capable  
360 of detecting dengue and chikungunya. *BMC Infect Dis.* 2017;17: 1-13.  
361 doi:10.1186/s12879-017-2382-0 PMID: 28427352
- 362 3. Orioli IM, Dolk H, Lopez-camelo JS, Mattos D, Poletta FA, Dutra MG, et al.  
363 Prevalence and clinical profile of microcephaly in South America pre-Zika ,  
364 2005-14 : prevalence and case-control study. *BMJ Clinical Res.* 2017;359:  
365 j5018. doi:10.1136/bmj.j5018
- 366 4. Safronetz D, Sloan A, Stein DR, Mendoza E, Barairo N, Ranadheera C, et al.  
367 Evaluation of 5 commercially available Zika virus immunoassays. *Emerg*  
368 *Infect Dis* 2017;23: 1577-1580. doi: 10.3201/eid2309.162043.

- 369 5. Epelboin Y, Talaga S, Epelboin L, Dusfour I. Zika virus: An updated review  
370 of competent or naturally infected mosquitoes. PLoS Negl Trop Dis.  
371 2017;11: e0005933. [doi:10.1371/journal.pntd.0005933](https://doi.org/10.1371/journal.pntd.0005933)
- 372 6. Zanluca C, De Melo VCA, Mosimann ALP, Dos Santos GIV, dos Santos  
373 CND, Luz K. First report of autochthonous transmission of Zika virus in  
374 Brazil. Mem Inst Oswaldo Cruz. 2015;110: 569-572. [doi:10.1590/0074-](https://doi.org/10.1590/0074-02760150192)  
375 [02760150192](https://doi.org/10.1590/0074-02760150192).
- 376 7. SVS. Secretaria de Vigilância em Saúde. Monitoramento dos casos de  
377 arboviruses urbanas transmitidas pelo Aedes (dengue, chikungunya e Zika)  
378 até a Semana Epidemiológica 12 de 2019 e Levantamento Rápido de Índices  
379 para *Aedes aegypti* (LIRAA). v. 50,n.13, p. 1-18. Abril.2.
- 380 8. Bueno MG, Martinez N, Abdalla L, Duarte dos Santos CN, Chame M.  
381 Animals in the Zika virus life cycle: What to expect from megadiverse Latin  
382 American countries. PLoS Negl Trop Dis. 2016;10(12):  
383 <https://doi.org/10.1371/journal.pntd.0005073>.
- 384 9. Favoretto SR, de Mattos CC, de Moraes NB, Carrieri ML, Rolim BN, Silva  
385 LM, et al. Rabies virus maintained by dogs in humans and terrestrial  
386 wildlife, Ceara Stat, Brazil. Emerg Infec Dis, 2006;12: 1978-1981. doi:  
387 [10.3201/eid1212.060429](https://doi.org/10.3201/eid1212.060429) PMID: 17326958.
- 388 10. Catenacci LS Nunes-Neto J, Deem SL, Palmer JL, Travassos-da Rosa ES,  
389 Tello JS. Diversity patterns of hematophagous insects in Atlantic forest  
390 fragments and human-modified areas of southern Bahia, Brazil. J Vector  
391 Ecol 2018;43: 293-305. doi: [10.1111/jvec.12313](https://doi.org/10.1111/jvec.12313).
- 392 11. Moreira-Soto A, Carneiro IO, Fischer C, Feldmann M, Kümmerer BM, Silva  
393 NS. Limited evidence for infection of urban and peri-urban nonhuman



- 394 primates with Zika and Chikungunya viruses In Brazil. *mSphere* 2018;3:  
395 E00523–17 doi: 10.1128/mSphere.00523-17.
- 396 12. WHO. Yellow fever Brazil. Disease outbreaks news. Accessed on May 21,  
397 2019. Available at: [https://www.who.int/csr/don/11-february-2019-yellow-](https://www.who.int/csr/don/11-february-2019-yellow-fever-brazil/en/)  
398 [fever-brazil/en/](https://www.who.int/csr/don/11-february-2019-yellow-fever-brazil/en/).
- 399 13. Abreu FVS, Ribeiro IP, Ferreira-de-Brito A, Santos AACD, Miranda RM,  
400 Bonelly IS, et al. *Haemagogus leucocelaenus* and *Haemagogus janthinomys*  
401 are the primary vectors in the major yellow fever outbreak in Brazil, 2016–  
402 2018. *Emerg Microbes Infect* 2019;8: 218-231. [https://doi:](https://doi.org/10.1080/22221751.2019.1568180)  
403 [10.1080/22221751.2019.1568180](https://doi.org/10.1080/22221751.2019.1568180).
- 404 14. Marcondes CB, Alencar J. A review of *Haemagogus* mosquitoes from  
405 Brazil. *Rev Biomed*. 2010;21: 221-238.
- 406 15. Figueiredo MLG, Gomes AC, Amarilla AA, Leandro AS, Orrico AS, Araujo  
407 RF, et al. Mosquitoes infected with dengue viruses in Brazil. *Virology* 2010; 7-  
408 no prelo doi: 10.1186/1743-422X-7-152.
- 409 16. Vasconcelos P, Sperb AF, Monteiro HA, Torres MA, Sousa MR,  
410 Vasconcelos HB, et al. Isolations of yellow fever virus from *Haemagogus*  
411 *leucocelaenus* in Rio Grande do Sul State, Brazil. *Trans R Soc Trop Med*  
412 *Hyg*. 2003;97: 60-62. [https://doi.org/10.1016/S0035-9203\(03\)90023-X](https://doi.org/10.1016/S0035-9203(03)90023-X)
- 413 17. Cardoso JC, Corseuil E, Barata JMS. Culicinae (Culicidae) ocorrentes no  
414 Estado do Rio Grande do Sul, Brasil. *Rev Bras Entomol*. 2005;49: 275-287.  
415 <http://dx.doi.org/10.1590/S0085-56262005000200013>.
- 416 18. Takizawa, F. H. Levantamento pedológico e zoneamento ambiental da  
417 Reserva Biológica de Poço das Antas. Monografia de Graduação. Escola  
418 Superior de Agricultura Luis de Queiroz/ USP, Piracicaba 1995. 56p.

- 419 19. INMET. Instituto Nacional de Meteorologia. Casimiro de Abreu. Accessed  
420 on May 23 2019. Available at:  
421 <http://www.inmet.gov.br/portal/index.php?r=tempo2/verProximosDias&code=3301306>.  
422
- 423 20. Silver, JB. Mosquito ecology: Field sampling methods. 2008. 3rd ed.  
424 Springer, New York, USA.
- 425 21. Alencar J, de Mello CF, Gil-Santana HR, Guimarães AÉ, de Almeida SAS,  
426 Gleiser RM. Vertical oviposition activity of mosquitoes in the Atlantic  
427 Forest of Brazil with emphasis on the sylvan vector, *Haemagogus*  
428 *leucocelaenus* (Diptera: Culicidae). J Vector Ecol. 2016;41: 18-26. doi:  
429 [10.1111/jvec.12189](https://doi.org/10.1111/jvec.12189)
- 430 22. Alencar J, de Almeida HM, Marcondes CB, Guimarães AÉ. Effect of  
431 multiple immersions on eggs and development of immature forms of  
432 *Haemagogus janthinomys* from South-Eastern Brazil (Diptera: Culicidae).  
433 Entomol News. 2008;119: 239-244. doi:[10.3157/0013-  
434 872x\(2008\)119\[239:eomioe\]2.0.co;2](https://doi.org/10.3157/0013-872x(2008)119[239:eomioe]2.0.co;2)
- 435 23. Consoli RAGB, Oliveira RL de. Principais mosquitos de importância  
436 sanitária no Brasil. SciELO - Editora FIOCRUZ; 1994. 224 p.
- 437 24. Reinert FJ. List of abbreviations for currently valid generic-level taxa in  
438 family Culicidae (Diptera). Eur Mosq Bull J Eur Mosq Control Assoc ISSN.  
439 2009;27: 68-76
- 440 25. Patel P, Landt O, Kaiser M, Faye O, Koppe T, Lass U, et al. Development of  
441 one-step quantitative reverse transcription PCR for the rapid detection of  
442 flaviviruses. Virol J. 2013;10:58. doi:[10.1186/1743-422X-10-58](https://doi.org/10.1186/1743-422X-10-58).

- 443 26. Otto TD, Vasconcellos EA, Gomes LHF, Moreira AS, Degraive WM,  
444 Mendonça-Lima L, et al. ChromaPipe: a pipeline for analysis, quality  
445 control, and management for a DNA sequencing facility. *Genet Mol Res.*  
446 2008;7: 861-871.
- 447 27. Ferreira BA, Ribeiro IP, de Miranda RM, Fernandes RS, Campos SS, da  
448 Silva KAB et al. First detection of natural infection of *Aedes aegypti* with  
449 Zika virus in Brazil and throughout South America. *Mem Inst Oswaldo*  
450 *Cruz.* 2016;111: 655-658. [https://doi: 10.1590/0074-02760160332](https://doi.org/10.1590/0074-02760160332)
- 451 28. Pabbaraju K, Ho KCY, Wong S, Fox JD, Tyler S, Drebot M, et al.  
452 Surveillance of Mosquito-Borne Viruses in Alberta Using Reverse  
453 Transcription Polymerase Chain Reaction With Generic Primers  
454 Surveillance of Mosquito-Borne Viruses in Alberta Using Reverse. 2009;46:  
455 640–648. [https://doi: 10.1603/033.046.0332](https://doi.org/10.1603/033.046.0332) PMID: 19496438
- 456 29. De Toni Aquino da Cruz LC, Serra OP, Leal-santos FA, Lucia AMR,  
457 Shlessarenko RD, Dos Santos MA. Natural transovarial transmission of  
458 dengue virus 4 in *Aedes aegypti* from Cuiabá , State of Mato Grosso , Brazil.  
459 *Rev da Fac Ciências Médicas Sorocaba.* 2015;48: 18–25.  
460 <http://dx.doi.org/10.1590/0037-8682-0264-2014>
- 461 30. De Lara Pinto AZ, DeCarvalho MS, De Melo FL, Ribeiro ALM, Ribeiro  
462 BM, Shlessarenko RD. Novel viruses in salivary glands of mosquitoes from  
463 sylvatic Cerrado , Midwestern Brazil. *PLoS One.* 2017; 1–16. [https://doi:](https://doi.org/10.1371/journal.pone.0187429)  
464 [10.1371/journal.pone.0187429](https://doi.org/10.1371/journal.pone.0187429) PMID: 29117239
- 465 31. Sule WF, Oluwayelu DO. Analysis of culex and aedes mosquitoes in  
466 southwestern Nigeria revealed no west Nile virus activity. *Pan Afr Med J.*  
467 2016;23: 1–10. [https://doi:10.11604/pamj.2016.23.116.7249](https://doi.org/10.11604/pamj.2016.23.116.7249)

- 468 32. De Souza Costa MC, Siqueira Maia LM, Costa de Souza V, Gonzaga AM,  
469 Correa de Azevedo V, Ramos Martins L, et al. Arbovirus investigation in  
470 patients from Mato Grosso during Zika and Chikungunya virus introduction  
471 in Brazil, 2015–2016. *Acta Trop.* 2019;190: 395-402.  
472 <https://doi:10.1016/j.actatropica.2018.12.019>
- 473 33. Terzian ACB, Auguste AJ, Vedovello D, Ferreira MU, Nogueira L, Suzuki  
474 RB, et al. Isolation and characterization of Mayaro virus from a human in  
475 Acre , Brazil. 2015;92: 401-404. <https://doi:10.4269/ajtmh.14-0417>
- 476 34. Campos Z, Juliano R, Velez J, Maria R, Nogueira R, Pauvolid-corre A, et al.  
477 Serological evidence of widespread circulation of West Nile virus and other  
478 Flavivi: e2706. <https://doi:10.1371/journal.pntd.0002706>
- 479 35. Pauvolid-Corrêa A, Kenney JL, Couto-Lima D, Campos ZMS, Schatzmayr  
480 HG, Nogueira RMR, et al. Ilheus virus isolation in the Pantanal, West-  
481 central Brazil. *PLoS Negl Trop Dis.* 2013;7.  
482 <https://doi:10.1371/journal.pntd.0002318>
- 483 36. Baleotti FG, Moreli ML, Figueiredo LTM. Brazilian Flavivirus phylogeny  
484 based on NS5. *Mem Inst Oswaldo Cruz.* 2003;98: 379–382.  
485 <https://doi:10.1590/S0074-02762003000300015>
- 486 37. Figueiredo RMP. Arboviroses emergentes no Brasil. *Rev Soc Med Trop.*  
487 2007;40: 224–229.
- 488 38. Figueiredo LTM. The Brazilian flaviviruses. *Microbes Infect.* 2000;2: 1643–  
489 1649. [https://doi:10.1016/S1286-4579\(00\)01320-4](https://doi:10.1016/S1286-4579(00)01320-4)
- 490 39. Kuno G, Mackenzie JS, Junglen S, Plyusnin A, Gubler DJ. Vertebrate  
491 Reservoirs of Arboviruses : Myth , Synonym of Amplifier , or Reality ?  
492 2017; 1–27. <https://doi:10.3390/v9070185>

- 493 40. Du S, Liu Y, Liu J, Zhao J, Champagne C, Tong L, et al. *Aedes* mosquitoes  
494 acquire and transmit Zika virus by breeding in contaminated aquatic  
495 environments. *Nat Commun.* Springer US; 2019;10: 1–11.  
496 <https://doi:10.1038/s41467-019-09256-0>
- 497 41. Ferreira B, Anielly R, Ieda P, Miranda, Rafaella M, Ferandes, et al. First  
498 report of autochthonous transmission of Zika virus in Brazil. *Mem Inst*  
499 *Oswaldo Cruz.* 2015;110: 569–572. [http://dx.doi.org/10.1590/0074-](http://dx.doi.org/10.1590/0074-02760150192)  
500 [02760150192](http://dx.doi.org/10.1590/0074-02760150192)
- 501 42. Grardl G, Caronl M, Mombo IM, Nkoghe D, Ondo SM, Jiolle D, Fontenille  
502 D, Paupy C, Leroy EM. Zika Virus in Gabon (Central Africa) – 2007: A  
503 New Threat from *Aedes albopictus*? *Plos Neg Torp Dis.* 2014;8(2)1-6.  
504 <https://doi:10.1371/journal.pntd.0002681>
- 505 43. Di Luca M, Severini F, Toma L, Boccolini D, Romi R, Remoli ME,  
506 Sabbatucci M, Rizzo C, Venturi G, Rezza G, Fortuna C. Experimental  
507 studies of susceptibility of Italian *Aedes albopictus* to Zika virus. *Euro*  
508 *Surveill.* 2016; 21(18)30199. [https://doi:10.2807/1560-](https://doi:10.2807/1560-7917.ES.2016.21.18.30223)  
509 [7917.ES.2016.21.18.30223](https://doi:10.2807/1560-7917.ES.2016.21.18.30223)
- 510 44. Zhuanzhuan Liu et al, Temperature Increase Enhances *Aedes albopictus*  
511 Competence to Transmit Dengue Virus, *Frontiers in Microbiology* (2017).  
512 <https://doi.org/10.3389/fmicb.2017.02337>
- 513 45. Chouin-Carneiro T, Vega-Rua A, Vazeille M, Yebakima A, Girod R,  
514 Goindin D, et al. Differential susceptibilities of *Aedes aegypti* and *Aedes*  
515 *albopictus* from the Americas to Zika virus. *PLoS Negl Trop Dis.* 2016;10:  
516 e0004543. <https://doi.org/10.1371/journal.pntd.0004543>

- 517 46. Santos, Beatriz Macedo Coimbra dos et al. Zika: an ongoing threat to  
518 women and infants. *Cad. Saúde Pública* [online]. 2018, vol.34, n.11,  
519 e00038218. Epub Nov 08, 2018. ISSN 0102-311X.  
520 <http://dx.doi.org/10.1590/0102-311x00038218>
- 521 47. Richards SL, Ponnusamy L, Unnasch TR, Hassan HK, Apperson CS. Host-  
522 feeding patterns of *Aedes albopictus* (Diptera:Culicidae) in relation to  
523 availability of humans and domestic animals in suburban landscapes of  
524 central North Carolina. *J Med Entomol* 2006;43: 543-551. PMID: 16739414
- 525 48. Faraji, A, Egizi, A, Fonseca, DM, Unlu, I, Crepeau, T. Comparative host  
526 feeding patterns of the Asian Tiger mosquito, *Aedes albopictus*, in urban  
527 and suburban Northeastern USA and implications for disease transmission.  
528 *Plos Negl Trop Dis* 2014;8: e3037.  
529 <https://doi.org/10.1371/journal.pntd.0003037>
- 530 49. Niebylski ML, Craig Jr GB. Dispersal and survival of *Aedes albopictus* at a  
531 scrap tire yard in Missouri. *J Am Mosq Control Assoc* 1994;10: 339-343.  
532 PMID: 7807074
- 533 50. Kim BH, Kim HK, Lee SJ. Experimental analysis of the blood-sucking  
534 mechanism of female mosquitoes. *J Exp Biol*. 2011;21: 1163-1169.  
535 <https://doi.org/10.1242/jeb.048793> PMID: 21389202
- 536 51. Vazeille, Vazeille M, Mousson L, Martin E, Failloux, et al. Orally co-  
537 infected *Aedes albopictus* from La Reunion Island, Indian Ocean, can deliver  
538 both dengue and Chikungunya infectious viral particles in their saliva. *PLoS*  
539 *Negl Trop Dis* 2010;4: e706. <https://doi.org/10.1371/journal.pntd.0000706>
- 540 52. Maciel-de-Freitas R, Neto RB, Gonçalves JM, Codeço CT, Lourenço-de-  
541 Oliveira R Movement of dengue vectors between the human modified

- 542 environment and an urban forest in Rio de Janeiro. J Med Entomol. 2006;43:  
543 1112-1120. [https://doi: 10.1603/0022-2585\(2006\)43\[1112:modvbt\]2.0.co;2](https://doi.org/10.1603/0022-2585(2006)43[1112:modvbt]2.0.co;2)  
544 [PMID: 17162942](https://pubmed.ncbi.nlm.nih.gov/17162942/)
- 545 53. Aragão NC, Müller GA, Balbino VQ, Costa Junior CR, Figueirêdo Júnior  
546 CS et al. A list of mosquito species of the Brazilian State of Pernambuco,  
547 including the first report of *Haemagogus janthinomys* (Diptera: Culicidae),  
548 yellow fever vector and 14 other species (Diptera: Culicidae). Rev Soc Bras  
549 Med Trop. 2010;43: 458-459. [https://doi: 10.1603/0022-](https://doi.org/10.1603/0022-2585(2006)43[1112:modvbt]2.0.co;2)  
550 [2585\(2006\)43\[1112:modvbt\]2.0.co;2](https://doi.org/10.1603/0022-2585(2006)43[1112:modvbt]2.0.co;2) [PMID: 17162942](https://pubmed.ncbi.nlm.nih.gov/17162942/)
- 551 54. Magalhães T., Braga, C., Cordeiro M., Oliveira A.L. S. T., Castanha P. M.  
552 S., Maciel A. P. R. et al. Zika virus displacement by a chikungunya outbreak  
553 in Recife, Brazil. Plos Neglected Tropical Disease. 2017: 1-25.  
554 <https://doi.org/10.1371/journal.pntd.0006055>
- 555 55. Tesh RB, Watts DMM, Russell KL, Damodaran C, Calampa C, Cabezas C,  
556 et al. Mayaro virus disease: an emerging mosquito-borne zoonosis in tropical  
557 South America. Clin Inf Dis 1999;28: 67-73 [https://doi: 10.1086/515070](https://doi.org/10.1086/515070)  
558 [PMID: 10028074](https://pubmed.ncbi.nlm.nih.gov/10028074/)
- 559 56. Althouse BM, Vasilakis N, Sall AA, Diallo M, Weaver SC, Hanley KA.  
560 Potential for Zika Virus to Establish a Sylvatic Transmission Cycle in the  
561 Americas. Plos Negl Trop Dis. 2016;10(12):1-11.  
562 <https://doi.org/10.1371/journal.pntd.0005055>
- 563 57. Benelli & Romano. Mosquito vectors of Zika vírus. Ento Gen. 2017;  
564 36(4)309 – 318. [https://doi: 10.1016/j.micinf.2018.01.006](https://doi.org/10.1016/j.micinf.2018.01.006) [PMID: 29481868](https://pubmed.ncbi.nlm.nih.gov/29481868/)
- 565 58. Silva DF, Vasconcelos SD, Eiras AE. Análise de atrativos químicos na  
566 coleta de flebotomíneos em uma área de mata atlântica da cidade de Recife,

- 567 Pernambuco, Brasil. Bol Mus Int Roraima. 2013;7(1):24-7.  
568 <http://dx.doi.org/10.5123/s2176-62232016000500014>
- 569 59. Vasconcelos PF, Bryant JE, Travassos da Rosa AP, Tesh RB, Rodrigues SG,  
570 Barret AD. Genetic divergence and dispersal of yellow fever virus, Brazil.  
571 Emerg Infect Dis. 2004;10:1578–84. [https://doi: 10.3201/eid1009.040197](https://doi:10.3201/eid1009.040197)  
572 [PMID: 15498159](https://pubmed.ncbi.nlm.nih.gov/15498159/)
- 573 60. Cardoso JC, Almeida MAB, Santos E, Fonseca DF, Sallum MAM, Noll CA,  
574 et al. Yellow fever virus in *Haemagogus leucocelaenus* and *Aedes serratus*  
575 mosquitoes, southern Brazil, 2008. Emerg Infect Dis. 2010;16: 1918-1924  
576 [https://doi: 10.3201/eid1612.100608](https://doi:10.3201/eid1612.100608) PMID: 21122222
- 577 61. Franco, O. História da Febre Amarela No Brasil. Ministério Da Saúde, 1969.  
578 P. 120-127.

579

580 **Figure legend:**

581 **Fig 1. Map of the locations used for mosquito collection in the study.** (Red: Positive  
582 sampling sites for Yellow fever (YFV) viruses, Zika virus (ZIKV) in primary forests in  
583 the Brazilian, municipalities of Nova Iguaçu and Casimiro de Abreu, state of Rio de  
584 Janeiro, Brazil). Maps were prepared in ArcGIS PRO data in the public domain (URL:  
585 <https://pro.arcgis.com/en/pro-app/>. Accessed: May 2019) and edited in CorelDRAW  
586 Graphics Suite X7.

587



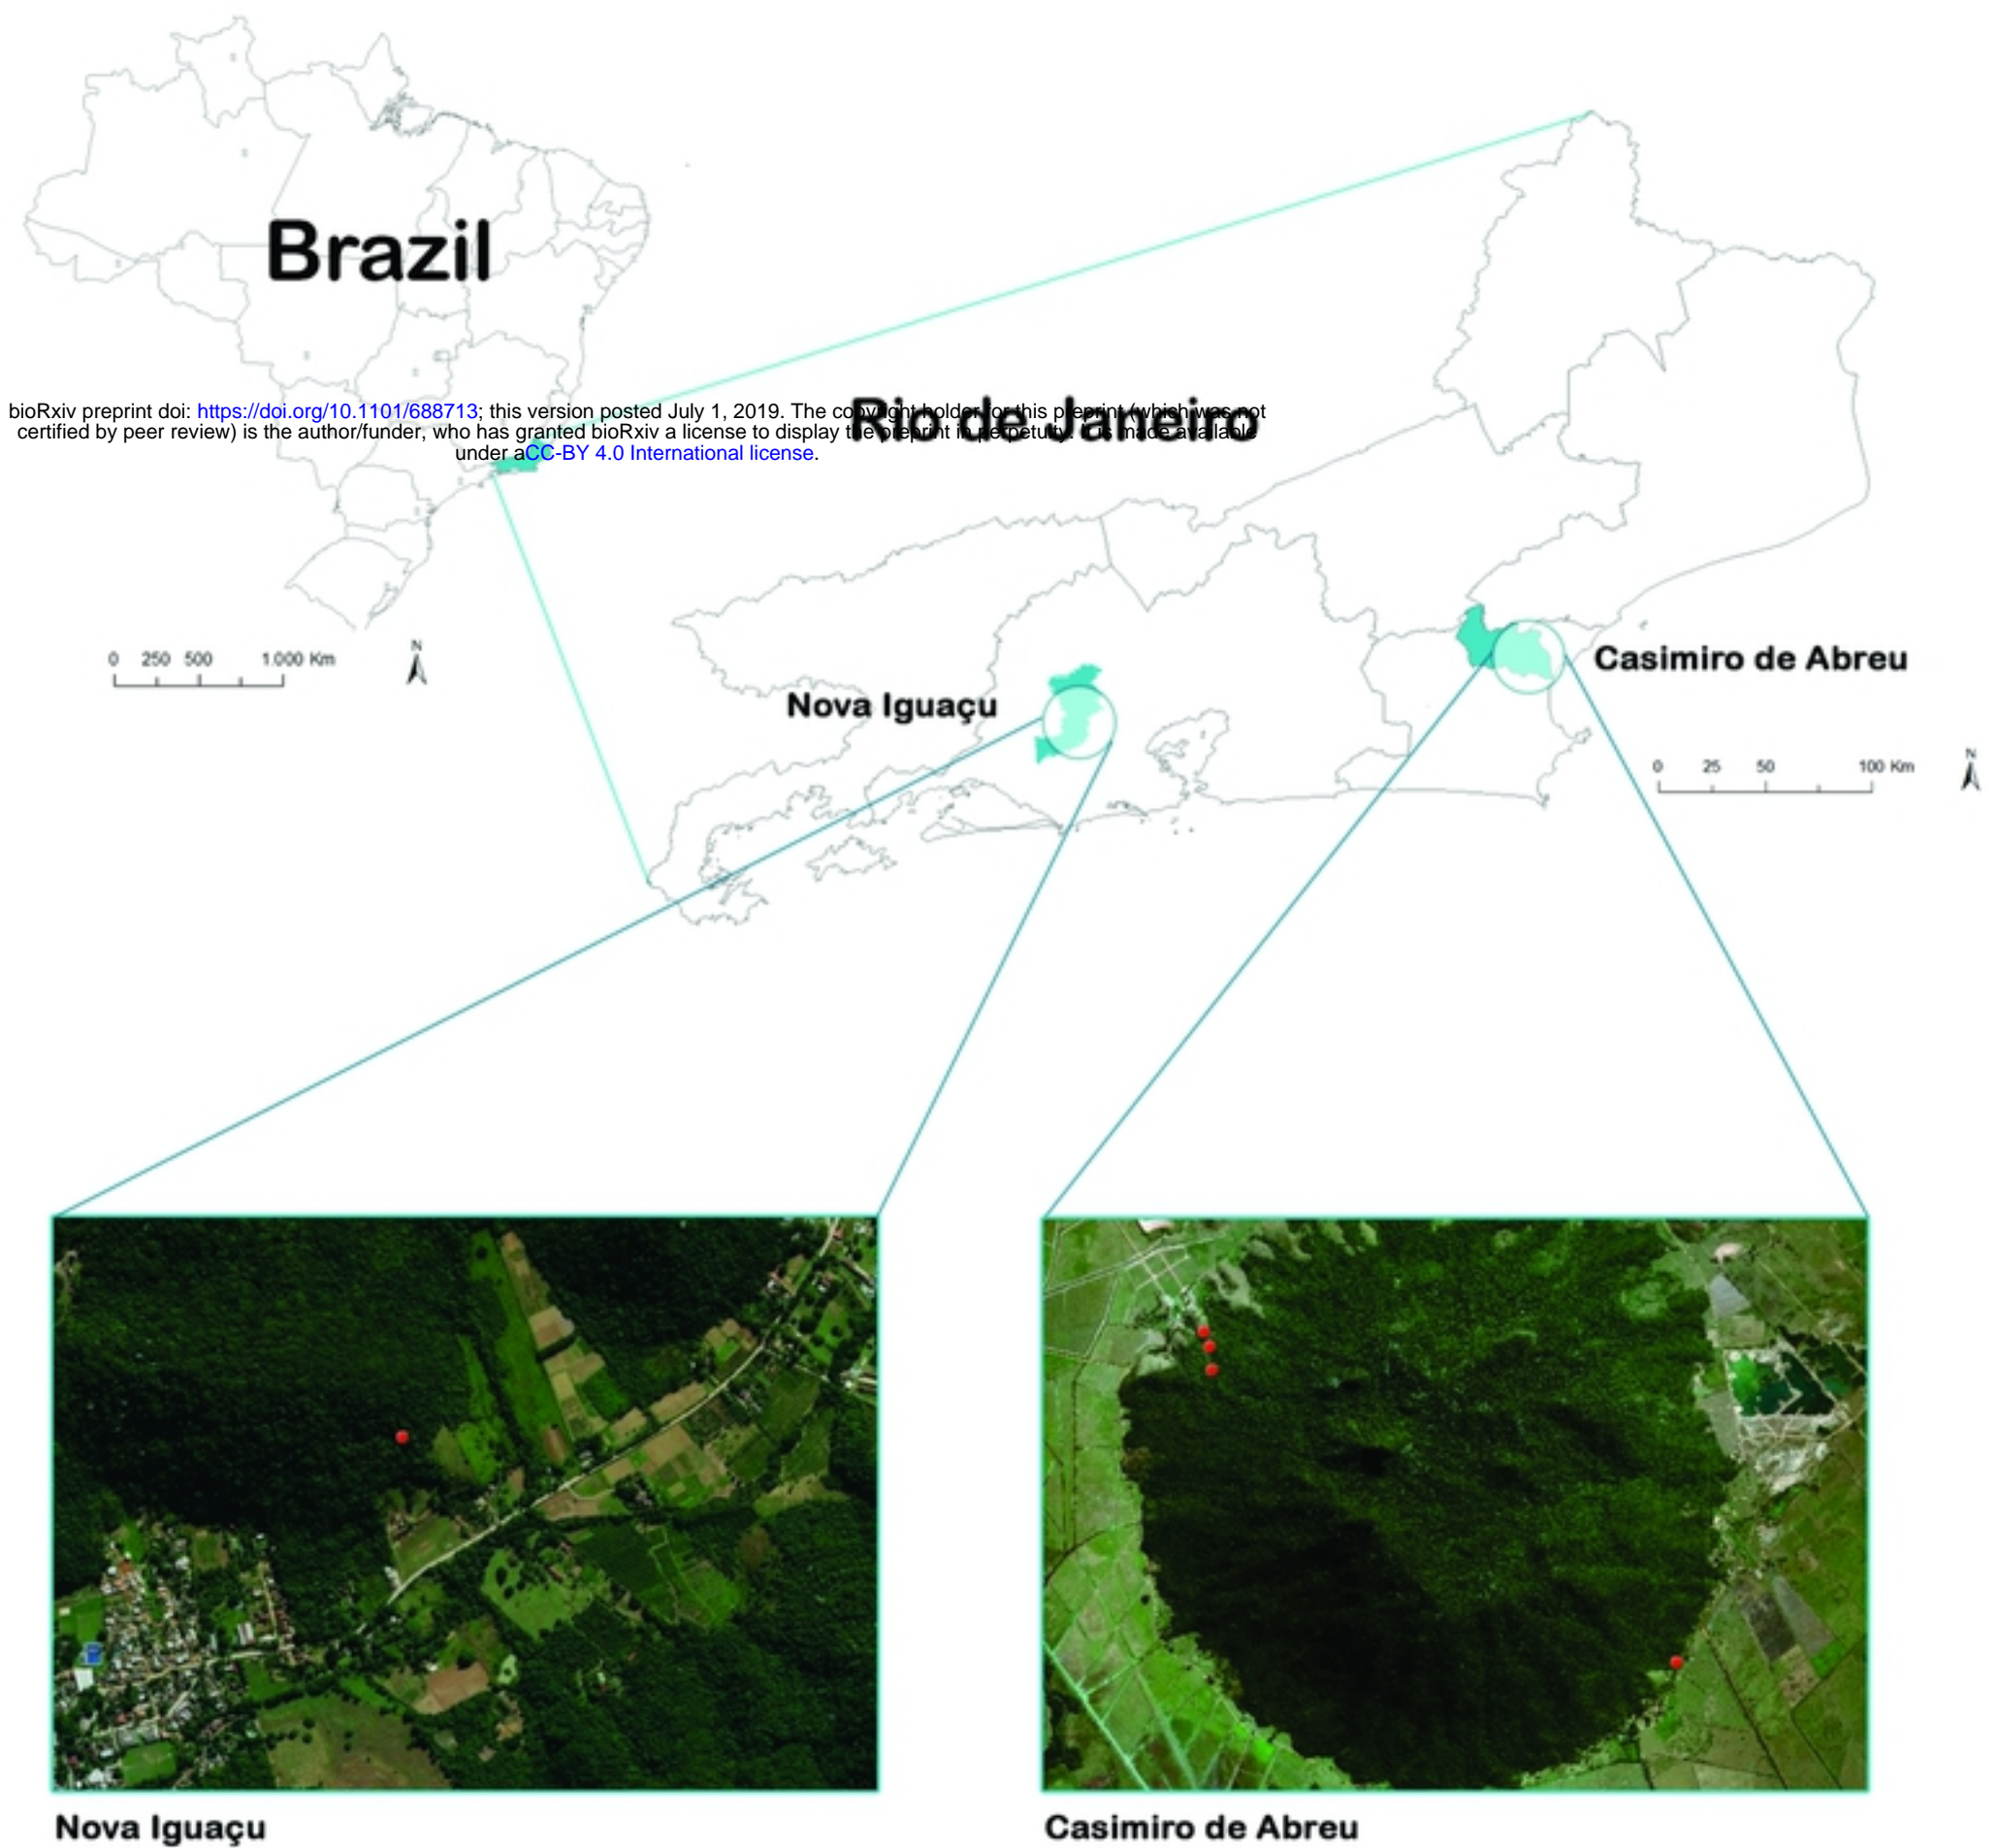

**Fig 1. Map of the locations used for mosquito collection in the study.** (Red: Positive sampling sites for Yellow fever (YFV) viruses, Zika virus (ZIKV) in primary forests in the Brazilian, municipalities of Nova Iguaçu and Casimiro de Abreu, state of Rio de Janeiro, Brazil). Maps were prepared in ArcGIS PRO data in the public domain (URL: <https://pro.arcgis.com/en/pro-app/>. Accessed: May 2019) and edited in CorelDRAW Graphics Suite X7.
